# Supplementary material for: Amplification of spatially isolated adenosine pathway by tumor–macrophage interaction induces anti-PD1 resistance in hepatocellular carcinoma
Source: Springer Nature journal article supplement (doi:10.1186/s13045-021-01207-x), 2021-11-27
Supplement: MOESM2 [file 19906996]

## **EXPERIMENTAL MODEL AND SUBJECT DETAILS**

### **Tissue microarray and human samples**

Tumor tissue samples and/or adjacent nontumorous samples were obtained from HCC patients underwent curative liver resection between 2018 to 2019 at the Liver Cancer Institute, Zhongshan Hospital, Fudan University. Biopsy samples and blood samples were collected from advanced HCC patients before nivolumab therapy. PBMCs were isolated from the healthy donors. Tissue microarray (TMA) were constructed by Shanghai Biochip Co. Ltd. (Shanghai, China), containing the tumor tissues and para-tumors tissue from 204 HCC patients who underwent liver surgery between 2006 to 2008 at the Liver Cancer Institute, Zhongshan Hospital, Fudan University. Tumor differentiation was defined according to the Edmondson grading system. All the HCC tissues were reviewed and confirmed histologically by H&E staining. The collection of human samples was approved by the Zhongshan Hospital Research Ethics Committee. Written informed consent was obtained from each patient.

### **qPCR**

Total RNAs or miRNAs were extracted from cultured cells or fresh-frozen HCC tissue samples with the MolPure® Cell/Tissue Total RNA Kit (Yeasen Biotechnology (Shanghai) Co., Ltd.) or Tissue & Cell microRNA Extraction Kit (HaiGene, Harbin, China) according to the protocols.

Real-time PCR for mRNA or circRNA was performed by using Hieff® qPCR SYBR Green Master Mix (Low Rox Plus, Yeasen Biotechnology (Shanghai) Co., Ltd.). For miRNA, cDNA synthesis was performed using TaqMan miRNA cDNA Synthesis Kit (HaiGene, Harbin, China) and qPCR for miRNA was performed by HG TaqMan miRNA PCR Kit (HaiGene, Harbin, China) according

to the protocols. Targeted miRNAs were normalized to U6B RNA levels using the  $2^{-\Delta Ct}$  model. Targeted mRNA or circRNA levels were adjusted using GAPDH. qPCR assays were performed in triplicate for each sample, and the mean value  $\pm$  SD was used for the statistics of RNA expression levels.

### **Western blot**

Cells or tissues were lysed by RIPA lysis buffer (Yeasen Biotechnology (Shanghai), Co. Ltd.) and the proteins were quantified using the BCA Kit. Proteins were separated on 10 or 12.5 % SDS-PAGE gels, transferred to PVDF membranes (Millipore) and blocked with Protein Free Rapid Blocking Buffer (Epizyme Biotech). After incubating overnight at 4 °C with the primary antibodies described in the Key Resources Table, the PVDF membranes were incubated with HRP-conjugated secondary antibody for 1 h at room temperature. Immersed the PVDF membranes with ECL Detection Reagent (Yeasen Biotechnology). The immunoblots were then detected using a gel image analysis system.

### **RNA ISH and RNA FISH**

Formalin-fixed paraffin-embedded slides were firstly incubated at 70°C for 40 min, then performed deparaffinization following dimethylbenzene and graded alcohol, rinsed with cold tap water for three times. The slides were then boiled in the retrieval solution for 15 minutes. After cooling to room temperature, added proteinase K(20  $\mu$ g/ml) to cover the tissue and incubated at 37°C for 8 minutes. Washed three times with PBS. Added Pre-hybridization solution to each section and incubated for 1 h at 37°C. Discarded the pre-hybridization solution, and the slides were hybridized

with probes for the targeted nucleic acid overnight at 40°C. Washed the slides with 5 ×, 1 ×, and 0.2 × saline-sodium citrate (SSC) at room temperature.

For FISH, stained cell nuclei by incubating with DAPI for 5 min in the dark, and then mounting with anti-fluorescence quenching sealing tablets. Microscopic examination and photography were then performed.

For ISH, added blocking solution to the section and incubated at room temperature for 30 min. After removing the blocking solution, anti-DIG-HRP was added and incubated at 37 °C for 40 min. Then, washed the sections in TBS four times for 5 min each. Dried sections slightly, and added NBT/BCIP to mark the tissues, finally stopped the reaction by wash in running tap water.

### **Cell lines and cell culture**

All the identified cell lines were provided from Key Laboratory of Carcinogenesis and Cancer Invasion, Ministry of Education of P.R.C or National Collection of Authenticated Cell Cultures, P.R.C. Cell lines HepG2, HCCLM3, MHC97H, Huh-7, PLC/PRF/5, H22, Hepa1-6 were cultured in DMEM with 10% fetal bovine serum. The cell lines THP-1 and Li-7 were cultured in RPMI-1640 with 10% fetal bovine serum. All the cells were cultured at 37 °C in a 5% CO<sub>2</sub> incubator.

### **Clonogenic assay**

Clonogenic assay were performed in six-well plates and seeded cells for each plate. After culturing for 2 weeks, removed the medium above the cells and rinsed carefully with PBS for three times. Then removed the PBS and add 2 ml 4% paraformaldehyde. After waiting for 15 min, removed the 4% paraformaldehyde and rinsed with PBS for three times. Added Crystal Violet Staining Solution

(0.5%) and leaved this for 20 min. Removed the Crystal Violet Staining Solution carefully and rinse with PBS. Leaved the plates to dry in normal air at room temperature for 1 day. Counted the number of colonies under the microscope.

### **Transwell assays and cell co-culture**

For Transwell assay, medium with 10% fetal bovine serum were added to the multiwell plate, followed by adding the Transwell inserts, and lastly adding the cells with medium without fetal bovine serum to the inside compartment. After 3-7 days, the Transwell inserts were removed and rinsed with PBS for three times. Then the Transwell inserts were immersed in 4% paraformaldehyde for 15 min and the cells inside compartment were wiped with a cotton swab. Rinsed with PBS for three times, added Crystal Violet Staining Solution (0.5%) and leaved this for 20 min. Washed the Crystal Violet and counted the number of the cells under the microscope after PBS wash.

For cell co-culture, one of the cells was added to the bottom of the multiwell plate with 10% fetal bovine serum and other needed reagents, followed by adding the Transwell inserts (pore size=0.4  $\mu\text{m}$ ), and finally added the second cell with the medium to the inside compartment.

### **Immunohistochemistry and multiplex immunofluorescence**

Formalin-fixed paraffin-embedded slides or TMA slides were incubated at 70°C for 40 min, then performed deparaffinization following dimethylbenzene and graded alcohol (95%, 85%,75%), rinsed with PBS for three times. Antigen retrieval was then performed by EDTA Antigen Retrieval Solution or Citrate Antigen Retrieval Solution at 95°C for 15 min. Rinsed with PBS for three times and blocking endogenous enzymes by Endogenous Peroxidase Blocking Buffer for 10-25 min.

Rinsed with PBS for three times and incubated with Normal Goat Serum For Blocking for 20 min.

Removed the blocking solution on the slide, and added the primary antibody working solution to completely cover the sample. Incubated at 4°C overnight. Washed the slides for 3 times with 1× TBST for 2 min each time. After removing the washing solution remaining on the slide, added HRP secondary antibody working solution, and immersed the sample area. Incubated at room temperature for 10 minutes and washed the slides 3 times with 1 × TBST.

Removed the washing solution remaining on the glass slide and added 1 × NEON TSA fluorescent dye to immerse the sample area. Incubated at room temperature for 5 min and washed the slides 3 times with 1 × TBST.

For multiplex immunofluorescence, repeated the steps above since antigen retrieval with different primary antibodies and fluorescent dye. Added anti-fluorescence quenching sealing tablets with DAPI and then mounted the slide with a cover glass. Imaging was performed by Panoramic MIDI (3DHISTECH Ltd.).

For Immunohistochemistry, after washing the HRP secondary antibody, dried sections slightly, and added DAB to mark the tissue for 10 min. Added Hematoxylin staining solution, staying for 50 sec and washed in tap water. Immersed the slide in water for 30 min. Performed dehydrate following gradient ethanol (75%, 85%, 100%) and dimethylbenzene. Finally, mounted the slide with resin mounting medium and covered glass.

### **Mice model and *in vivo* tumor models**

Male C57BL/6J mice aged 6-week-old were purchased from Vitalriver Laboratory Animal Co., Ltd (Beijing, China). C57BL/6-Entpd1<sup>fl/fl</sup> (CKOCMP-12495-Entpd1-B6J-VA) and C57BL/6-Entpd1<sup>KO</sup>

(KOCMP-12495-Entpd1-B6N-VA) were constructed by Cyagen (Suzhou, Jiangsu, China). C57BL/6-Lyz2<sup>CreERT2</sup> were constructed by Shanghai Model Organisms Center, Inc. (Shanghai, China). C57BL/6-Lyz2<sup>CreERT2</sup> × C57BL/6-Entpd1<sup>fl/fl</sup> mice were constructed in our lab. Silencing ENTPD1 in macrophage was activated by treated with tamoxifen (dissolved in corn oil, 20mg/ml by shaking overnight at 37°C) i.p. (100ul/mouse, for 5 days). The mice were housed and bred in SPF facility. All the experiments were approved by the animal welfare board in Zhongshan Hospital, Fudan University.

Subcutaneous tumor xenograft in mice model: 1×10<sup>6</sup> H22 mice liver tumor cells in 0.1 ml of DMEM were implanted subcutaneously in the right flank of the mice. The tumor volume was screened by caliper every three days.

Orthotopic tumor xenograft in mice model: 1×10<sup>6</sup> H22 mice liver tumor cells labeled luciferase (H22-luc) in 50uL Matrigel were implanted to construct orthotopic liver xenografts in the mouse. The tumors were screened by optical *in vivo* Imaging system.

Treatment was performed 7 days later after tumor construction. Anti-mouse PD1 was intraperitoneally injected (10 mg/kg, 3 times every week, for 2 weeks). POM1 was intraperitoneally injected (5 mg/kg, 4 times every week, for 2 weeks). Clophosome was intraperitoneally injected (0.2 μl/mouse, every week, for 2 weeks).

#### **ATP, AMP, ADP and Adenosine measurement**

Prepared standard products (ATP, AMP, ADP and adenosine) and dissolved in concentration of 10 μg/mL with ultrapure water. Injected 10 μl to the machine (Agilent 1260 Infinity II) and record the chromatogram. Added 300 μl Extract 1 to 200 μl sample and stayed at 4°C for 1 h. Centrifuged at

4°C, 15,000 rpm for 10 min and took 200 µl of the supernatant, add an equal volume of Extract 2, mix well, centrifuge at 15,000 rpm for 10 min, take the supernatant, and filter with a 0.22µm needle filter. Inject 10µl on the machine and record the chromatogram. The chromatogram acquisition and integration of the compound is performed by the software Chemstation (Agilent).

## **ELISA**

Supernatants were collected from medium, and IL-10 and TNF- $\alpha$  were analyzed using ELISA kits (R&D Systems) according to the instructions.

## **RNA sequencing**

RNA sequencing and bioinformatics analysis were performed by Majorbio (Shanghai, China). In brief, tumor tissue or cell samples were subjected to total RNA extraction with TRIzol reagent. For circRNA sequencing, ribosomal RNAs and linear RNAs were removed by Ribo-Zero Gold rRNA Removal Kit and RNase R to enrich circRNA. Enriched RNAs were amplified and transcribed to create the final cDNA library. Next generation sequencing cDNA libraries was performed on the Illumina PE150 platform.

## **SILAC (stable isotope labeling by amino acids in cell culture)**

SILAC (stable isotope labeling by amino acids in cell culture) was performed according to the protocol (doi: 10.1038/nprot.2006.427). In brief, to investigate different cell protein profiles, THP-1<sup>co-exoOE</sup> was cultured in a growth medium with 'heavy' amino acids and THP-1<sup>co-exoCtl</sup> was cultured in a growth medium with 'light' amino acids. While a reverse SILAC experiment that switched

heavy and light medium was also performed. The cells were collected and mixed ('heavy': 'light'=1:1), and analyzed with mass spectrometry. Intensity of MS signals between 'light' and 'heavy' peptides was identified to show the different protein abundance between cells.

### **Optical in vivo Imaging**

Mice were anaesthetized with sodium pentobarbital. Then the mice were administrated D-Luciferin (dissolved in PBS, 150 mg/kg) by intraperitoneal injection. After waiting for 15 min, fluorescence imaging was performed by the imaging system IVIS Lumina K (PerkinElmer) with the software Living Image 4.4.

### **Exosome isolation**

Balanced the sample of medium, cell lysis or serum with PBS, and centrifuged at 1,500 g, 4°C for 15 minutes. The supernatant then centrifuged at 10,000 g, 4°C for 30 minutes. Acquired the supernatant after centrifugation and centrifuged for 30 minutes at 14,000 g, 4°C. After centrifugation, transferred the supernatant to an ultra-high-speed centrifuge tube, and used a pipette to balance with 1×PBS buffer on a balance that can be accurate to 0.001 g, and carefully placed it in the ultra-high-speed centrifuge at 4°C, 110,000 g ultra-high-speed centrifugation for 120 minutes. After centrifugation, carefully discarded the supernatant, resuspended the pellet in 1 × PBS buffer, and centrifuged at 4°C, 110,000 g, ultra-high speed for 60 minutes. After centrifugation, the supernatant was carefully discarded. The remaining liquid at the bottom of the centrifuge tube was the exosomes. Used 300 µl of 1 × PBS to carefully blow the bottom of the centrifuge tube and suck it into the 0.5-1.5 ml centrifuge tube.



### **Dual luciferase reporter assay**

HEK 293T cells were co-transfected with a luciferase reporter vector and miR-488-3p or miR-1298 mimics or the negative control using Lipo-fectamine 2000 reagent. After 48 h, Firefly and Renilla luciferase signals were then determined by dual-luciferase reporter assay (Promega, USA).

### **Tumor dissociation**

Tumor dissociation were performed following the protocol from Tumor Dissociation Kit, mouse (#130-096-730, Miltenyi Biotec) or Tumor Dissociation Kit, human (#130-095-929, Miltenyi Biotec). In brief, enzymes were prepared by reconstitution of the lyophilized powder, then we prepared enzyme mix by adding the components into a gentleMACS™ C Tube, including DMEM and the enzymes. Tumor tissue from mice or HCC patients was cut into small pieces and transferred into the C Tubes. Then the gentleMACS™ Dissociator were used to perform dissociation program. After termination of the program, the C Tubes containing tumor tissue were detached and incubated at 37 °C under continuous rotation. After incubation for certain time according to the protocol, resuspended sample and applied the cell suspension to a strainer (70 µm) placed on a 50 ml tube. Washed the strainer with 10 ml RPMI 1640 and centrifuged cell suspension at  $350 \times g$  for 5 min. Aspirated supernatant and performed further experiment.

### **Flow cytometry and sorting**

Isolated single-cell suspensions from the blood or tissue of human or mouse were centrifuged (350g, 5min, at 4°C) in a centrifuge and resuspended in staining buffer (1% FBS in PBS) on ice. Calculated

the cells and transferred  $10^6$  cells into each staining tube. All the samples were placed on ice throughout the staining procedure and single-cell suspensions were washed with PBS (4°C) for two times and resuspended in 20  $\mu$ l staining buffer (1% FBS in PBS). FcBlocks (1  $\mu$ l for each tube) were used to incubate with the single-cell suspensions for 15 min before staining.

For surface staining, the antibodies were incubated with cell suspensions for 20 min in dark place at 4°C. For intracellular staining, saponin was used after fixation by 4% paraformaldehyde, and the antibodies were incubated with cell suspensions for 20 min in dark place at 4°C. For nuclear staining, after fixation and permeabilization by buffer set, the antibodies were incubated with cell suspensions for 20 min in dark place at 4°C.

For staining of peripheral blood samples, after staining, red blood cells were lysed for 4 min at room temperature in red blood cell lysing buffer. Cell suspensions were washed with PBS (4°C) for two times and filtered using a strainer (70  $\mu$ m) before flow cytometry analysis. Data was analyzed by FlowJo 10.6.2 software.

The surface staining for sorting was the same as that for flow cytometry analysis, except that all the procedure was operated in a sterile environment.

| <b>Key resource table</b>          |                                      |                   |
|------------------------------------|--------------------------------------|-------------------|
| <b>REAGENT or RESOURCE</b>         | <b>SOURCE</b>                        | <b>IDENTIFIER</b> |
| <b>Antibodies</b>                  |                                      |                   |
| Anti-Mouse CD45-BV711              | BioLegend                            | 103147            |
| Anti-Mouse CD11c-APC               | BioLegend                            | 117309            |
| Anti-Mouse CD8a-BV605              | BioLegend                            | 100744            |
| Anti-Mouse CD4-BV510               | BioLegend                            | 100559            |
| Anti-Mouse F4/80-PE/Cy7            | BioLegend                            | 123113            |
| Anti-Mouse CD163-BV421             | BioLegend                            | 155309            |
| Anti-Mouse CD19-Percp/Cy5.5        | BioLegend                            | 115533            |
| Anti-Mouse NK1.1-PE/Dazzle594      | BioLegend                            | 108747            |
| Anti-Mouse CD3e-FITC               | BioLegend                            | 100203            |
| Anti-Mouse CD3e-BV510              | BD Pharmingen                        | 563024            |
| Anti-Mouse CD39-PE                 | BioLegend                            | 143803            |
| Anti-Mouse CD39-PE-Cy7             | BioLegend                            | 143806            |
| Anti-Mouse CD73-BV605              | BioLegend                            | 127215            |
| Anti-Mouse/Human Granzyme B-FITC   | BioLegend                            | 515403            |
| Anti-Human CD45-FITC               | BioLegend                            | 304006            |
| Anti-Human/Mouse CD11b-APC/Cy7     | BioLegend                            | 101226            |
| Anti-Human GZMB-FITC               | BioLegend                            | 372206            |
| Anti-Human CD56-FITC               | BD Pharmingen                        | 562794            |
| Anti-Human CD8-PerCP/Cy5.5         | BD Pharmingen                        | 565310            |
| Anti-Human CD4-Alexa 700           | BD Pharmingen                        | 557922            |
| Anti-Human CD19-BV605              | BD Pharmingen                        | 562653            |
| Anti-Human CD163-PE/Cy7            | BioLegend                            | 333614            |
| Anti-Human CD141-BV510             | BD pharmingen                        | 563298            |
| Anti-Human CD279 (PD-1)-PE         | BioLegend                            | 329905            |
| Anti-Human CD366 (Tim-3)-APC       | BioLegend                            | 345011            |
| Anti-Human TIGIT (VSTM3)-PE        | BioLegend                            | 372703            |
| Anti-Human CD39 PE                 | BioLegend                            | 328207            |
| Anti-Human CD39 APC                | BioLegend                            | 328209            |
| Anti-human CD73 PE                 | BioLegend                            | 344003            |
| Human Trustain FcX                 | Biolegend                            | 422301            |
| Trustain FcX(anti-mouse CD16/32)   | Biolegend                            | 101319            |
| Anti-CD8 alpha antibody [EPR21769] | Abcam                                | ab217344          |
| Anti-CD163 antibody [EPR19518]     | Abcam                                | ab182422          |
| F4/80 (D2S9R) XP® Rabbit mAb       | Cell Signaling Technology, Inc.      | #70076            |
| Anti-Human CD8(SP16)               | Gene Tech (Shanghai) Company Limited | GT211202          |

|                                                                        |                                                             |           |
|------------------------------------------------------------------------|-------------------------------------------------------------|-----------|
| Anti-Human CD4(EP204)                                                  | Gene Tech<br>(Shanghai)<br>Company Limited                  | GT219102  |
| NCAM1 (CD56) (E7X9M) XP Rabbit mAb                                     | Cell Signaling<br>Technology, Inc.                          | #99746S   |
| CD19 (D4V4B) XP® Rabbit mAb                                            | Cell Signaling<br>Technology, Inc.                          | #90176S   |
| CD68 (D4B9C) XP® Rabbit mAb                                            | Cell Signaling<br>Technology, Inc.                          | #76437S   |
| CD163 (D6U1J) Rabbit mAb                                               | Cell Signaling<br>Technology, Inc.                          | #93498    |
| Anti-TSG101 antibody [EPR7131(B)]                                      | Abcam                                                       | ab133586  |
| Anti-CD63 antibody [EPR5702]                                           | Abcam                                                       | ab134045  |
| Anti-CD63 antibody [EPR21151]                                          | Abcam                                                       | ab217345  |
| Anti-CD39 antibody [EPR20627]                                          | Abcam                                                       | ab223842  |
| Anti-CD39 antibody [EPR3678(2)]                                        | Abcam                                                       | ab108248  |
| Anti-ENTPD1 antibody                                                   | Sigma-Aldrich                                               | HPA014067 |
| NT5E/CD73 (D7F9A) Rabbit mAb                                           | Cell Signaling<br>Technology, Inc.                          | #13160    |
| Anti-Human CD68(PG-M1)                                                 | Cell Signaling<br>Technology, Inc.                          | GM087607  |
| Anti-Human Cytokeratin 8&18                                            | Hangzhou Bailing<br>(Biolynx)<br>Biotechnology<br>Co., Ltd. | BX50145   |
| GAPDH (D16H11) XP® Rabbit mAb                                          | Cell Signaling<br>Technology, Inc.                          | #5174     |
|                                                                        |                                                             |           |
| <b>Primers for real-time PCR</b>                                       |                                                             |           |
| hsa_circ_0001663-F:<br>CATCAAGGGAATGAACTTCACACT                        |                                                             |           |
| hsa_circ_0001663-R:<br>TGAGCTACACCATCGACTTTAACA                        |                                                             |           |
| ENTPD1-F: CAAGACCAGACAGAAAGGGG                                         |                                                             |           |
| ENTPD1-R: CTGTCCCACCCAGATCTCC                                          |                                                             |           |
|                                                                        |                                                             |           |
| <b>Probes</b>                                                          |                                                             |           |
| hsa_circ_0001663 probe: 5'-<br>TTGAATTGGCTTTAGTGTGAAGTTCATTCCCT-<br>3' |                                                             |           |
| miR-488-3p<br>probe:GACCAAGAAATAGCCTTTCAA                              |                                                             |           |
|                                                                        |                                                             |           |

|                                                                                         |                      |                                                                                                                             |
|-----------------------------------------------------------------------------------------|----------------------|-----------------------------------------------------------------------------------------------------------------------------|
| <b>Drug</b>                                                                             |                      |                                                                                                                             |
| PD1 antibody (HRP00262-012) provided as gifts by Hengrui Medicine Com., Jiangsu, China) |                      |                                                                                                                             |
|                                                                                         |                      |                                                                                                                             |
| <b>Reagent</b>                                                                          |                      |                                                                                                                             |
| D-Luciferin, Potassium Salt                                                             | Yeasen               | 40902ES02                                                                                                                   |
| CFSE Cell Division Tracker Kit                                                          | BioLegend            | Cat#423801                                                                                                                  |
| GW4869                                                                                  | MedChemExpress (MCE) | HY-19363                                                                                                                    |
| Clophosome                                                                              | FormuMax             | F70101C-N                                                                                                                   |
| PKH67 Green Fluorescent Cell Linker Mini Kit                                            | Sigma-Aldrich        | MINI67                                                                                                                      |
| Sodium metatungstate(POM1)                                                              | MedChemExpress (MCE) | HY-103259                                                                                                                   |
| ATP                                                                                     | Solarbio             | A9130                                                                                                                       |
| ADO                                                                                     | Solarbio             | A8240                                                                                                                       |
| ADP                                                                                     | Solarbio             | A0180                                                                                                                       |
| AMP                                                                                     | Solarbio             | SA9510                                                                                                                      |
| IL10 ELISA kit                                                                          | R&D Systems          | DY217B                                                                                                                      |
| TNF- $\alpha$ ELISA kit                                                                 | R&D Systems          | DY210                                                                                                                       |
| Tumor Dissociation Kit, mouse                                                           | Miltenyi Biotec      | 130-096-730                                                                                                                 |
| Tumor Dissociation Kit, human                                                           | Miltenyi Biotec      | 130-095-929                                                                                                                 |
| True-Nuclear™ Transcription Factor Buffer Set                                           | BioLegend            | 424401                                                                                                                      |
|                                                                                         |                      |                                                                                                                             |
| <b>Software</b>                                                                         |                      |                                                                                                                             |
| Prism8                                                                                  | Graphpad             | <a href="https://www.graphpad.com">https://www.graphpad.com</a>                                                             |
| FlowJo 10.6.2                                                                           | Flowjo               | <a href="https://www.flowjo.com">https://www.flowjo.com</a>                                                                 |
| R 3.6.3                                                                                 | The R Foundation     | <a href="https://www.r-project.org/">https://www.r-project.org/</a>                                                         |
| SPSS 20.0                                                                               | IBM                  | <a href="https://www.ibm.com/analytics/spss-statistics-software">https://www.ibm.com/analytics/spss-statistics-software</a> |
|                                                                                         |                      |                                                                                                                             |
| <b>Others</b>                                                                           |                      |                                                                                                                             |
| BD LSRFortessa™ X-20 Flow Cytometer                                                     | BD Biosciences       | N/A                                                                                                                         |
| MoFlo XDP                                                                               | Beckman Coulter      | N/A                                                                                                                         |
| gentleMACS™ Dissociator                                                                 | Miltenyi Biotec      | N/A                                                                                                                         |
| Optima XPN-100                                                                          | Beckman              | N/A                                                                                                                         |
| JEM-1230                                                                                | JEOL Ltd.            | N/A                                                                                                                         |
| IVIS® Lumina K                                                                          | PerkinElmer          | N/A                                                                                                                         |
| Pannoramic MIDI                                                                         | 3DHISTECH Ltd.       | N/A                                                                                                                         |
